# Supplementary material for: Detecting and Profiling of Milk Thistle Metabolites in Food Supplements: A Safety-Oriented Approach by Advanced Analytics
Source: MDPI journal article supplement (doi:10.3390/metabo13030440), 2023-03-17
Supplement: s1 [file s1]

**Supplementary Table S1.** Different categories and types of compounds found in milk thistle seeds or different herbal formulations, their confirmed activities by different references.

| Category                              | Compounds                                                                                | Activity/[references]                                                                                 |
|---------------------------------------|------------------------------------------------------------------------------------------|-------------------------------------------------------------------------------------------------------|
| Flavonolignans<br>(Silymarin complex) | Silyhermin                                                                               | Liver protection and regeneration, antioxidant, anti-inflammatory, antitumor/[8,9,16,18, 83, 106, 47] |
|                                       | Dehydrosilybin                                                                           |                                                                                                       |
|                                       | Silybin A / B (Silybinin)                                                                |                                                                                                       |
|                                       | Silychristin                                                                             |                                                                                                       |
|                                       | Silydianin                                                                               |                                                                                                       |
| Phenolic acids                        | Gallic acid                                                                              | Antioxidant/[18,23,65]                                                                                |
|                                       | Coumaric acid                                                                            |                                                                                                       |
|                                       | Ferulic acid                                                                             |                                                                                                       |
| Terpenoids                            | Coniferyl alcohol                                                                        | Antibacterial, antifungal, suppression of NO release/[65]                                             |
|                                       | Carnosic acid                                                                            |                                                                                                       |
|                                       | Secoisolariciresinol                                                                     |                                                                                                       |
| Flavonoids                            | Apigenin                                                                                 | Antioxidant (radical scavenging) / [8 ,9, 18, 23, 65,]                                                |
|                                       | Naringenin                                                                               |                                                                                                       |
|                                       | Luteolin                                                                                 |                                                                                                       |
|                                       | Kaempferol                                                                               |                                                                                                       |
|                                       | Quercetin                                                                                |                                                                                                       |
|                                       | Taxifolin                                                                                |                                                                                                       |
|                                       | (Epi)catechin gallate & Epigallocatechin, Epigallocatechin gallate, Catechin 5-glucoside |                                                                                                       |
|                                       | Myricetin                                                                                |                                                                                                       |
|                                       | Campesterol and beta-Sitosterol                                                          |                                                                                                       |
|                                       | Apigenin 7-glucuronide                                                                   |                                                                                                       |
|                                       | Luteolin 5-glucoside                                                                     |                                                                                                       |
|                                       | Rutin                                                                                    |                                                                                                       |
| Fatty acids and lipids                | Myristic acid C12:0                                                                      | Components of cell membranes structure and energetic metabolism in mitochondria/ [47]                 |
|                                       | Palmitoleic acid C16:1                                                                   |                                                                                                       |
|                                       | Palmitic acid C16:0                                                                      |                                                                                                       |
|                                       | Linolenic acid C18:3                                                                     |                                                                                                       |
|                                       | Linoleic acid C18:2                                                                      |                                                                                                       |
|                                       | Oleic acid C18:1                                                                         |                                                                                                       |
|                                       | Stearic acid C18:0                                                                       |                                                                                                       |
|                                       | Eicosaenoic acids 20:1, 20:2, C20:3                                                      |                                                                                                       |
|                                       | Arachidic acid C20:0                                                                     |                                                                                                       |
|                                       | Mycolipanic acid (C24:0)                                                                 |                                                                                                       |
|                                       | Myristyl linolenate                                                                      |                                                                                                       |
|                                       | Palmitoylcholines                                                                        |                                                                                                       |
|                                       | Monoglycerides                                                                           |                                                                                                       |
|                                       | Sphingosine 1-phosphate                                                                  |                                                                                                       |
|                                       | Lysophosphatidylcholines 18:2, 20:3                                                      |                                                                                                       |
